# Supplementary material
Source: PubMed Central journal article supplement (PMC4616933)
Supplement: AEM.02835-15_zam999116730so1.pdf [file AEM.02835-15_zam999116730so1.pdf]

## **Supplemental Material**

### **Methods**

**Filter disk assays.** Filter disk assays were performed using a modified version of a previously described protocol (1). Overnight cultures of each strain were pelleted, washed once, resuspended in fresh tryptone medium, and adjusted to an OD<sub>600</sub> of 0.05. 50 µL of this suspension was spread onto tryptone medium plates with noble agar, 20 mM lactate, and 40 mM fumarate. 20 µL of 1 M CdCl<sub>2</sub>, 1 M CoCl<sub>2</sub>, 1 M CuCl<sub>2</sub>, 6 M FeCl<sub>2</sub>, 4 M MnCl<sub>2</sub>, 1 M NiCl<sub>2</sub>, or 1 M ZnCl<sub>2</sub> was placed onto a 6-mm filter disk in the center of the plate. Zones of growth inhibition were measured after plates were incubated anaerobically at 30°C for two days.

**Fumarate and ferric citrate growth curve.** Overnight cultures of each strain were pelleted, washed once, and resuspended in fresh SBM. Cultures of anaerobic SBM supplemented with 20 mM lactate, 40 mM fumarate, and 1 mM ferric citrate were incubated with shaking at 30°C. Growth was measured by periodically plating serial 1:10 dilutions of each culture to LB plates and performing colony counts after one day of incubation.

**Table S1. Inhibition of wild-type and  $\Delta feoE$  by divalent metals in filter disk assays.**

|                   | <b>Wild-type</b>           |                  | <b><math>\Delta feoE</math></b> |                  |
|-------------------|----------------------------|------------------|---------------------------------|------------------|
| <b>Metal</b>      | <b>Ave. zone size (mm)</b> | <b>S.D. (mm)</b> | <b>Ave. zone size (mm)</b>      | <b>S.D. (mm)</b> |
| FeCl <sub>2</sub> | 26.3                       | 0.6              | 35.0                            | 2.0              |
| CdCl <sub>2</sub> | 41.0                       | 1.0              | 41.0                            | 1.0              |
| CoCl <sub>2</sub> | 36.7                       | 2.1              | 36.7                            | 1.5              |
| CuCl <sub>2</sub> | 31.0                       | 1.0              | 31.7                            | 0.6              |
| MnCl <sub>2</sub> | 14.3                       | 1.5              | 14.3                            | 2.1              |
| NiCl <sub>2</sub> | 27.3                       | 0.6              | 26.3                            | 0.6              |
| ZnCl <sub>2</sub> | 21.7                       | 3.1              | 21.0                            | 0.0              |

**Table S2. *Shewanella* and *E. coli* strains used for FieF and FeoE alignment**

| <b>Species name</b>     | <b>Strain</b> | <b>Protein Accession No.</b> |
|-------------------------|---------------|------------------------------|
| <i>Escherichia coli</i> | 042           | CBG37114.1                   |
| <i>Escherichia coli</i> | 101-1         | EDX38712.1                   |
| <i>Escherichia coli</i> | 55989         | CAV01107.1                   |
| <i>Escherichia coli</i> | ABU 83972     | ADN48832.1                   |
| <i>Escherichia coli</i> | APEC O1       | ABJ03381.1                   |
| <i>Escherichia coli</i> | BL21(DE3)     | ACT45593.1                   |
| <i>Escherichia coli</i> | BW2952        | ACR65792.1                   |
| <i>Escherichia coli</i> | CFT073        | AAN83294.1                   |
| <i>Escherichia coli</i> | DH1(ME8569)   | BAJ45640.1                   |
| <i>Escherichia coli</i> | ED1a          | CAR10725.2                   |
| <i>Escherichia coli</i> | FVEC1302      | EFI17836.1                   |
| <i>Escherichia coli</i> | H299          | EGI48340.1                   |
| <i>Escherichia coli</i> | H591          | EGI43690.1                   |
| <i>Escherichia coli</i> | H736          | EGI08350.1                   |
| <i>Escherichia coli</i> | HS            | ABV08323.1                   |
| <i>Escherichia coli</i> | IAI1          | CAR00891.1                   |
| <i>Escherichia coli</i> | IAI39         | YP_002409011.1               |
| <i>Escherichia coli</i> | IHE3034       | ADE89170.1                   |
| <i>Escherichia coli</i> | K12(DH10B)    | ACB04927.1                   |
| <i>Escherichia coli</i> | K12(MG1655)   | NP_418350.1                  |
| <i>Escherichia coli</i> | K12(W3110)    | BAE77395.1                   |

|                         |                   |                |
|-------------------------|-------------------|----------------|
| <i>Escherichia coli</i> | LF82              | CAP78372.1     |
| <i>Escherichia coli</i> | M605              | EGI13549.1     |
| <i>Escherichia coli</i> | M718              | EGI18796.1     |
| <i>Escherichia coli</i> | NA114             | AEG38898.1     |
| <i>Escherichia coli</i> | NC101             | EFM53266.1     |
| <i>Escherichia coli</i> | NRG 857C          | YP_006122251.1 |
| <i>Escherichia coli</i> | O103:H2(12009)    | BAI33309.1     |
| <i>Escherichia coli</i> | O111:H(11128)     | BAI38485.1     |
| <i>Escherichia coli</i> | O127:H6(E2348/69) | CAS11767.1     |
| <i>Escherichia coli</i> | O139:H28(E24377A) | KIO42250.1     |
| <i>Escherichia coli</i> | O157:H7(EDL933)   | AIG71382.1     |
| <i>Escherichia coli</i> | O157:H7(Sakai)    | NP_312867.1    |
| <i>Escherichia coli</i> | O157:H7(TW14359)  | ACT74675.1     |
| <i>Escherichia coli</i> | O26:H11(11368)    | BAI27835.1     |
| <i>Escherichia coli</i> | O55:H7(CB9615)    | ADD59161.1     |
| <i>Escherichia coli</i> | P12b              | AFG42844.1     |
| <i>Escherichia coli</i> | REL606            | ACT41437.1     |
| <i>Escherichia coli</i> | S88               | CAR05545.1     |
| <i>Escherichia coli</i> | SMS-3-5           | ACB16239.1     |
| <i>Escherichia coli</i> | TA143             | EGI29243.1     |
| <i>Escherichia coli</i> | TA206             | EGI24455.1     |
| <i>Escherichia coli</i> | TA271             | EGI33945.1     |
| <i>Escherichia coli</i> | TA280             | EGI38874.1     |

|                                 |              |                |
|---------------------------------|--------------|----------------|
| <i>Escherichia coli</i>         | UMN026       | CAR15569.1     |
| <i>Escherichia coli</i>         | UM146        | ADN73293.1     |
| <i>Escherichia coli</i>         | UTI89        | ABE09910.1     |
| <i>Shewanella sp.</i>           | 38A_GOM-205M | WP_028780032.1 |
| <i>Shewanella sp.</i>           | ANA-3        | WP_011715494.1 |
| <i>Shewanella sp.</i>           | ECSMB14102   | WP_039034709.1 |
| <i>Shewanella sp.</i>           | MR-4         | WP_011621062.1 |
| <i>Shewanella sp.</i>           | MR-7         | WP_011627504.1 |
| <i>Shewanella sp.</i>           | POL2         | WP_037425101.1 |
| <i>Shewanella sp.</i>           | W3-18-1      | ABM23071.1     |
| <i>Shewanella sp.</i>           | ZOR0012      | WP_047538636.1 |
| <i>Shewanella amazonensis</i>   | SB2B         | ABM01633.1     |
| <i>Shewanella baltica</i>       | OS185        | ABS06427.1     |
| <i>Shewanella baltica</i>       | OS223        | ACK44795.1     |
| <i>Shewanella benthica</i>      | KT99         | EDP98627.1     |
| <i>Shewanella colwelliana</i>   | ATCC 39565   | WP_028762938.1 |
| <i>Shewanella denitrificans</i> | OS217        | ABE56734.1     |
| <i>Shewanella fidelis</i>       | ATCC BAA-318 | WP_028769358.1 |
| <i>Shewanella frigidimarina</i> | NCIMB 400    | ABI70177.1     |
| <i>Shewanella halifaxensis</i>  | HAW-EB4      | ABZ74916.1     |
| <i>Shewanella loihica</i>       | PV-4         | ABO25434.1     |
| <i>Shewanella marina</i>        | JCM 15074    | WP_025821863.1 |
| <i>Shewanella oneidensis</i>    | MR-1         | WP_011074103.1 |

|                                 |              |                |
|---------------------------------|--------------|----------------|
| <i>Shewanella pealeana</i>      | ATCC 700345  | ABV89241.1     |
| <i>Shewanella piezotolerans</i> | WP3          | ACJ27086.1     |
| <i>Shewanella putrefaciens</i>  | 200          | ADV52715.1     |
| <i>Shewanella putrefaciens</i>  | CN-32        | ABP74101.1     |
| <i>Shewanella sediminis</i>     | HAW-EB3      | ABV34894.1     |
| <i>Shewanella waksmanii</i>     | ATCC BAA-643 | WP_028773609.1 |
| <i>Shewanella woodyi</i>        | ATCC 51908   | ACA84584.1     |
| <i>Shewanella violacea</i>      | DSS12        | BAJ00217.1     |
| <i>Shewanella xiamenensis</i>   | BC01         | KEK26877.1     |

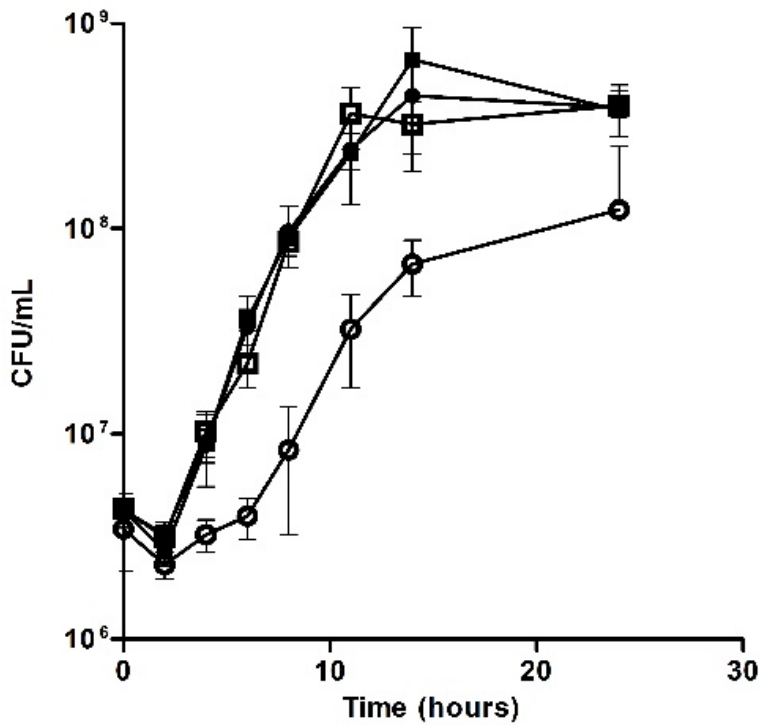

**FIG. S1. Anaerobic growth of wild-type MR-1 and  $\Delta$ *feoE* strains on fumarate and ferric citrate.** The rate of growth in SBM with 20 mM lactate, 40 mM fumarate, and 1 mM ferric citrate over time was measured for (○)  $\Delta$ *feoE* with empty pBBR1MCS-2, (□) MR-1 with empty pBBR1MCS-2, (●)  $\Delta$ *feoE* with pBBR1MCS-2::*feoE*, and (■) MR-1 with pBBR1MCS-2::*feoE*. Growth was determined by counting colony-forming units per mL of culture medium (CFU/mL).

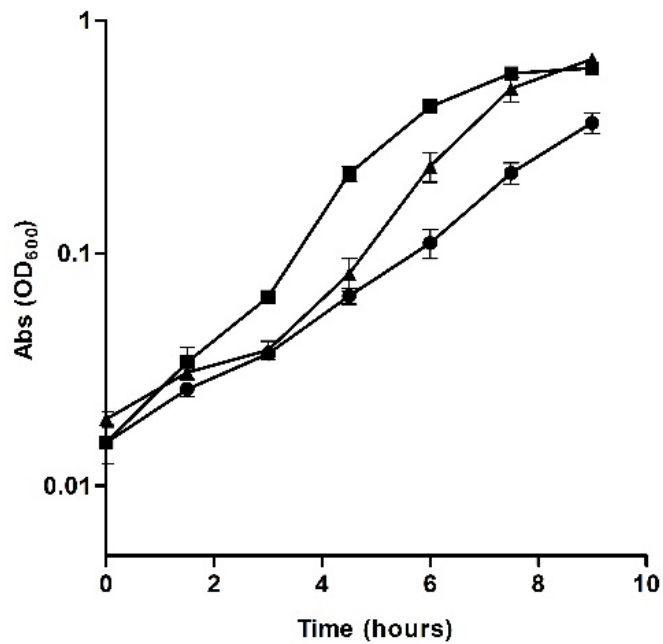

**FIG. S2. Growth of *E. coli*  $\Delta$ *fieF* complemented with *fieF* or *feoE* in the presence of excess  $\text{Fe}^{2+}$ .** Growth in anaerobic LB with 20 mM lactate, 40 mM fumarate, and 7 mM  $\text{FeCl}_2$  was measured for *E. coli*  $\Delta$ *fieF* with (●) empty pBBR1MCS-2, (■) pBBR1MCS-2::*feoE*, or (▲) pBBR1MCS-2::*fieF*.



## References

1. Rugh CL, Wilde HD, Stack NM, Thompson DM, Summers AO, Meagher RB. 1996. Mercuric ion reduction and resistance in transgenic *Arabidopsis thaliana* plants expressing a modified bacterial *merA* gene. Proc Natl Acad Sci USA. **93**:3182–3187.
